# Supplementary material for: An ESIPT-based fluorescent probe for sensitive detection of hydrazine in aqueous solution
Source: Royal Society of Chemistry journal article supplement (doi:10.1039/c5ob00209e), 2015-01-01
Supplement: c5ob00209e1.pdf [file c5ob00209e1.pdf]

Supporting information

**ESIPT-based fluorescent probe for sensitive detection of  
hydrazine in aqueous solution**

Ji Zhou, Ruiyan Shi, Jianxu Liu, Rui Wang, Yufang Xu\*, Xuhong Qian\*

Shanghai Key Laboratory of Chemical Biology, State Key Laboratory of Bioreactor Engineering ,  
School of Pharmacy, East China University of Science and Technology, Shanghai, 200237, China.

Fax: +86 21 6425 2603; Tel: +86 21 6425 3589; E-mail: [xhqian@ecust.edu.cn](mailto:xhqian@ecust.edu.cn); [yfxu@ecust.edu.cn](mailto:yfxu@ecust.edu.cn)

**Table of Contents:**

|                                                                         |   |
|-------------------------------------------------------------------------|---|
| <b>1. Instruments</b>                                                   | 2 |
| <b>2. Synthesis</b>                                                     | 2 |
| <b>3. Methods and data</b>                                              | 3 |
| 1) HPLC data                                                            | 3 |
| 2) The detection limit                                                  | 4 |
| 3) The detection of hydrazine in different systems                      | 4 |
| 4) The selectivity of the probe (some common species in the human body) | 5 |
| <b>4. NMR data</b>                                                      | 6 |
| <b>5. HRMS data</b>                                                     | 7 |

## 1. Instruments

**Instruments:**  $^1\text{H}$ -NMR and  $^{13}\text{C}$ -NMR spectra were taken in  $\text{CDCl}_3$  and  $\text{DMSO}-d_6$  at  $25\text{ }^\circ\text{C}$  on a Bruker AV-400 spectrometer in NMR Facility of East China University of Science and Technology (ECUST). The chemical shifts were reported in ppm (TMS as internal standard). Mass spectra were performed in the Analysis Center of East China University of Science and Technology (ECUST).

## 2. Synthesis

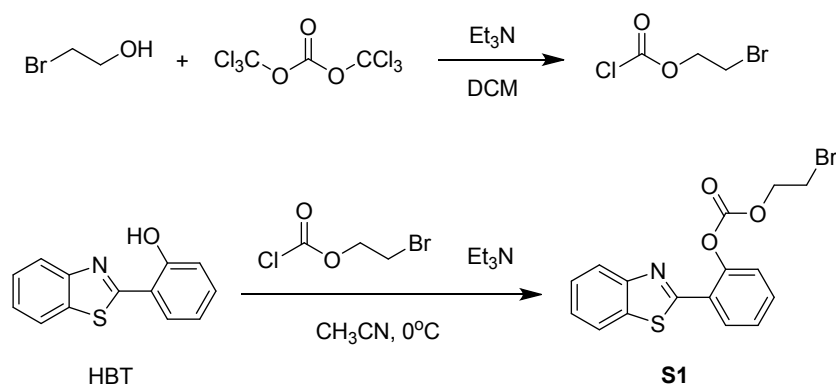

Scheme 1 The synthesis of the probe S1

### Synthesis of compound 1

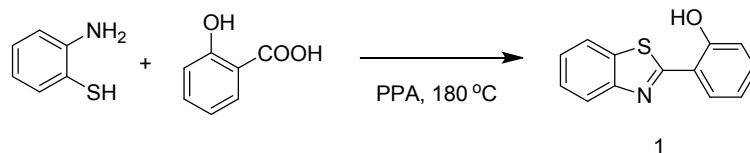

To a solution of salicylic acid (1.1 g, 8 mmol) in 20 mL of polyphosphoric acid was added 2-aminobenzenethiol (1 g, 8 mmol), and the mixture was heated to  $180\text{ }^\circ\text{C}$  for 3 hours. Then the mixture was poured into ice water. The precipitate was filtered, washed with water for 3 times, and the filter cake was dried off to give the title compound (1.55 g, 85%).

### Synthesis of compound S1

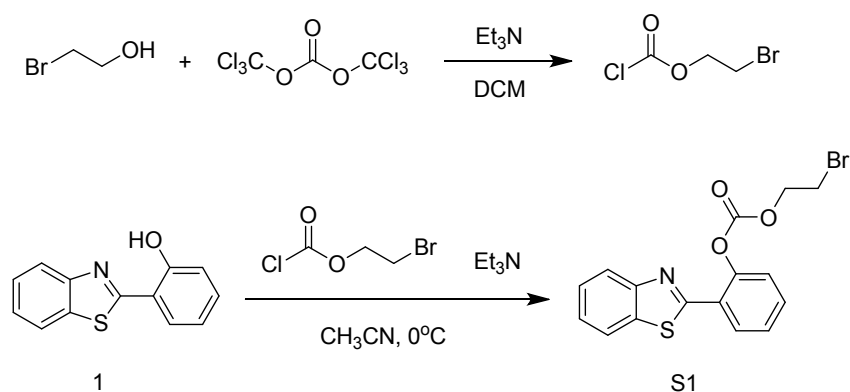

To a solution of 2-bromoethanol (124 mg, 1 mmol) and triethylamine (101 mg, 1 mmol) in  $\text{CH}_2\text{Cl}_2$  (10 mL) was added a solution of triphosgene (110 mg, 0.37 mmol) in  $\text{CH}_2\text{Cl}_2$  (8 mL) at 0 °C under Ar. The reaction was kept at 0 °C for half an hour and then warmed to room temperature for an hour.

To a solution of compound 1 (227 mg, 1 mmol) in anhydrous  $\text{CH}_3\text{CN}$  (15 mL) was added the above acyl chloride solution at 0 °C. After the addition, triethylamine (101 mg, 1 mmol) was added and the reaction was kept at 25 °C for about 9 hours. When the reaction was over, the mixture was concentrated in vacuo. Then water and  $\text{CH}_2\text{Cl}_2$  was added. The organic layer was washed with brine, dried over anhydrous  $\text{Na}_2\text{SO}_4$ , and concentrated in vacuo. The residue was purified by silica gel flash chromatography to give the title compound **S1** (208 mg, 55%).

$^1\text{H}$  NMR (400 MHz,  $\text{CDCl}_3$ ):  $\delta$  8.29 (dd,  $J_1 = 1.2$  Hz,  $J_2 = 6.4$  Hz, 1H), 8.09 (d,  $J = 8.4$  Hz, 1H), 7.93 (d,  $J = 8.0$  Hz, 1H), 7.54-7.49 (m, 2H), 7.44-7.39 (m, 2H), 7.34 (d,  $J = 8.0$  Hz, 1H), 4.59 (t,  $J = 6.0$  Hz, 2H), 3.61 (t,  $J = 6.0$  Hz, 2H).  $^{13}\text{C}$  NMR (100 MHz,  $\text{CDCl}_3$ ):  $\delta$  162.40, 153.12, 152.74, 148.34, 135.41, 131.60, 130.42, 126.99, 126.39, 126.15, 125.49, 123.47, 123.18, 121.47, 68.03, 27.79. HRMS (ESI): Calcd for  $\text{C}_{16}\text{H}_{13}\text{BrNO}_3\text{S}$  ( $\text{M}+\text{H}^+$ ) 377.9800; Found, 377.9802.

### 3. Methods and data

#### 1) HPLC data

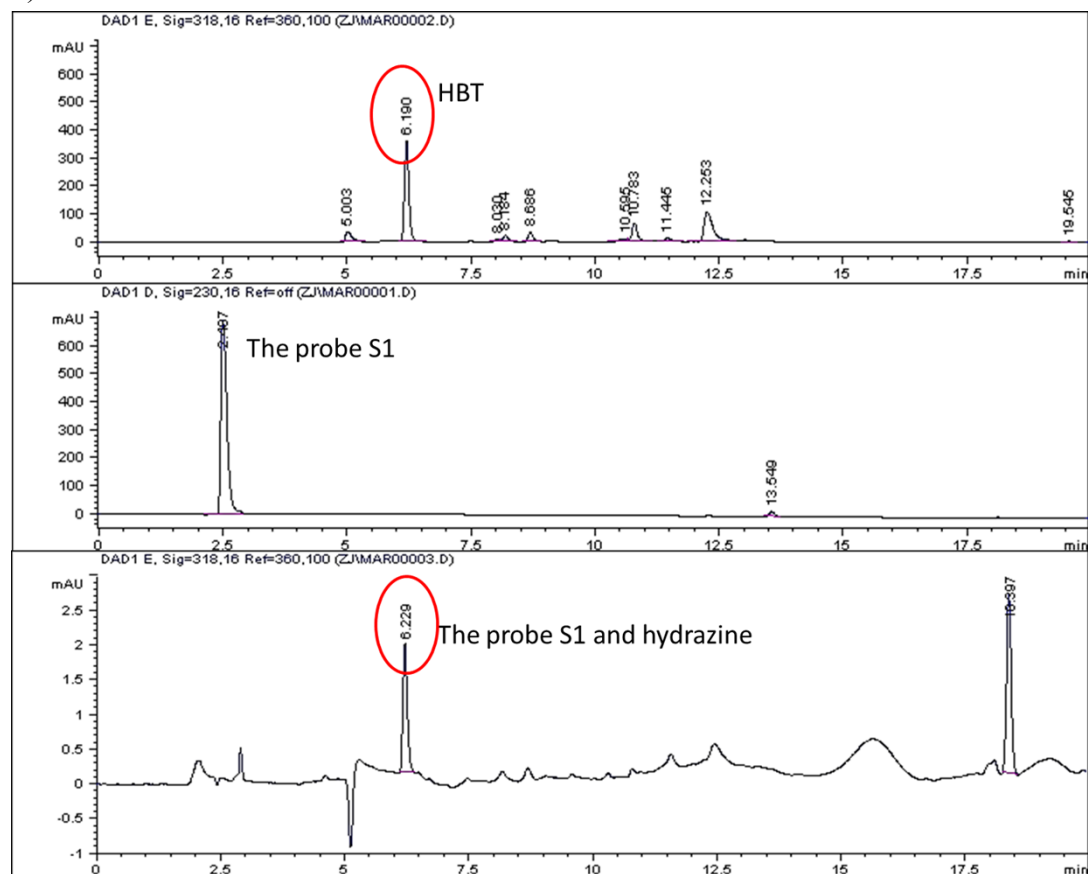

**Fig 1** The HPLC data of the detection. In the third picture, the concentration of the probe was 20  $\mu\text{M}$  and 20  $\mu\text{M}$  hydrazine was added.

HPLC was performed on a ZORBAX RX-C18 column (Analytical 4.6 $\times$ 250mm 5-Micron, Agilent) with a HP 1100 system. The HPLC solvents employed were acetonitrile and buffer (acetic acid and ammonium acetate pH 6.0). HPLC conditions were as follows: solvent A: solvent B = 10:90 (0 min)-100:0 (20 min), flow rate 1 mL/min, detection by UV (230 nm and 318 nm).

We have already performed the HPLC test. And we found that after adding hydrazine, the retention time of the product was as same as the time of the HBT. Therefore it indicated that the detection was based on ESIPT mechanism and substitution-cyclization-elimination cascade.

## 2) The detection limit

The fluorescence intensity of **S1** was measured by 10 times and the standard deviation was calculated. The fluorescence intensity at 465 nm was plotted as a concentration of hydrazine. By using detection limit  $3\sigma/k$ , the detection limit was calculated as 0.147  $\mu\text{M}$ .  $\sigma$  is the standard deviation of the fluorescence intensity of **S1**,  $k$  is the slope between the fluorescence intensity at 465 nm versus the hydrazine concentration.

## 3) The detection of hydrazine in different systems

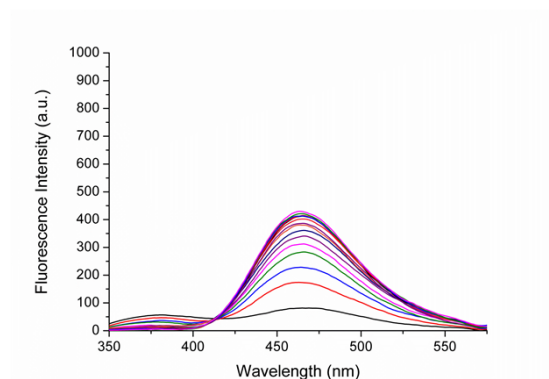

**Fig 2** The fluorescence responses of the probe **S1** (5  $\mu\text{M}$ ) to hydrazine (20  $\mu\text{M}$ ) in 20 min. The detection system was PBS buffer (pH 7.4) with 1% DMSO as a cosolvent. Slit: 5 nm, 5 nm.

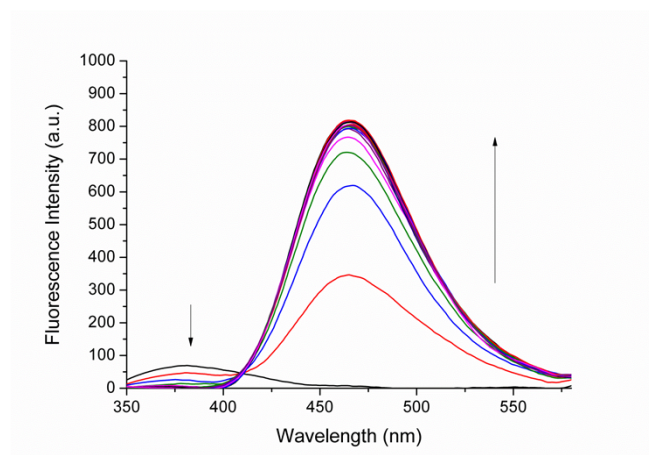

**Fig 3** The fluorescence responses of the probe **S1** (5  $\mu\text{M}$ ) to hydrazine (20  $\mu\text{M}$ ) in 15 min. The detection system was PBS buffer (pH 7.4) with 1% ethanol as a cosolvent. Slit: 5 nm, 5 nm.

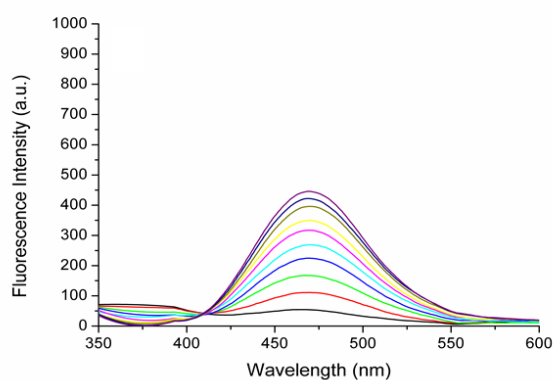

**Fig 4** The fluorescence responses of the probe **S1** (5  $\mu\text{M}$ ) to hydrazine (20  $\mu\text{M}$ ) in 20 min. The detection system was PBS buffer (pH 7.4) with 1%  $\text{CH}_3\text{CN}$  as a cosolvent. Slit: 5 nm, 5 nm.

#### 4) The selectivity of the probe (some common species in the human body)

We investigated the selectivity of the probe, choosing some common species in the human body. The results showed that the probe didn't respond to GSH, NaSH, Cys or Hcy. This indicated that the probe had the potential of detecting hydrazine in the biological system.

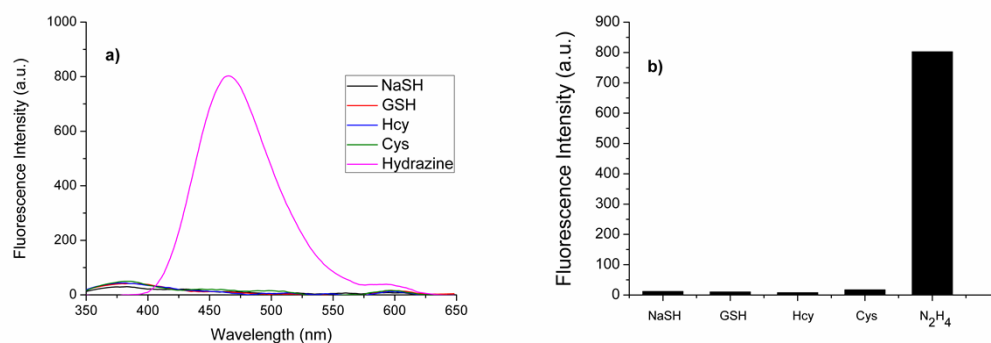

**Fig.5** (a) Fluorescence responses of the probe **S1** (5  $\mu\text{M}$ ) to some common species in the human

body in the PBS buffer (with 1% ethanol) at room temperature. (b) The column chart of the selectivity of the probe. Excitation wavelength was 300 nm. Slit: 5 nm, 5 nm. The concentrations of NaSH, GSH, Hcy and Cys were 500  $\mu$ M. The concentration of hydrazine was 20  $\mu$ M.

#### 4. NMR data

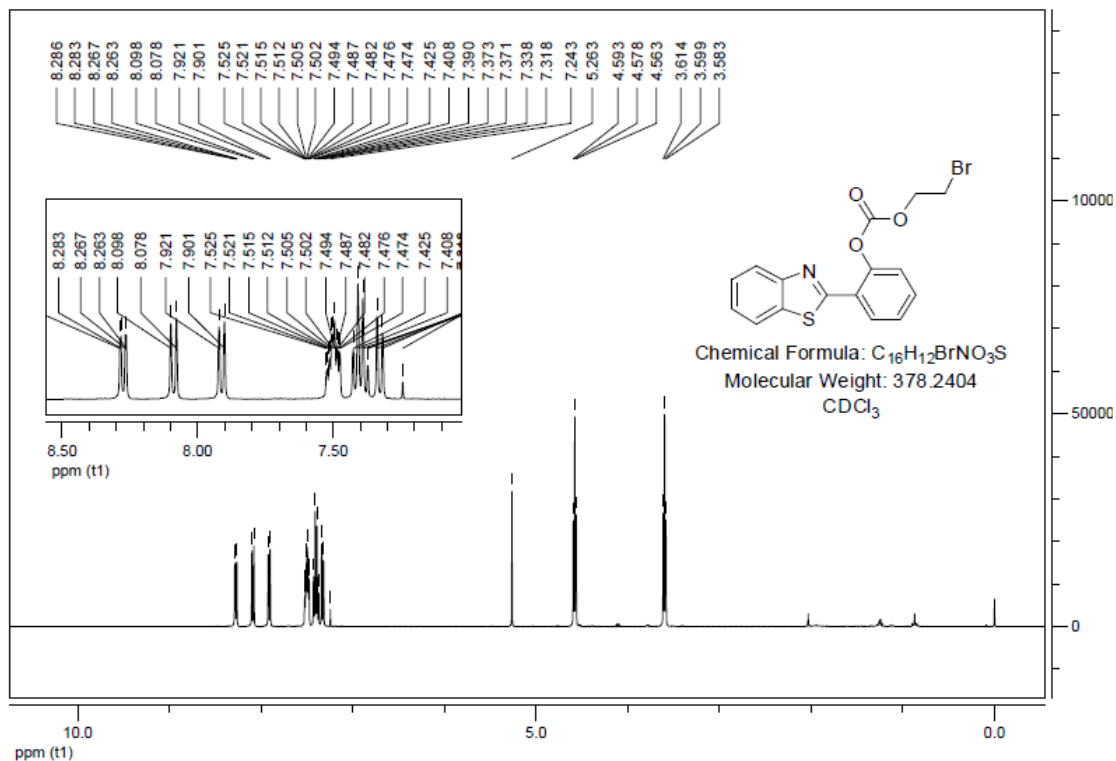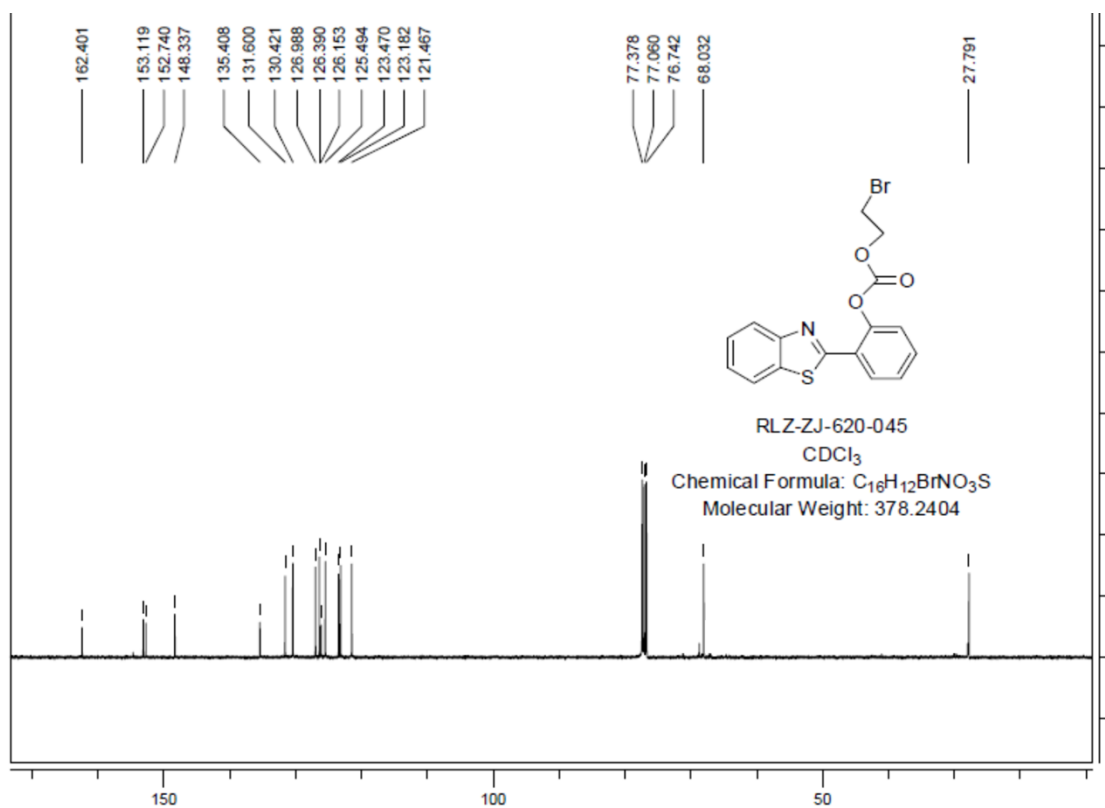

## 5. HRMS data

### Elemental Composition Report

Page 1

#### Single Mass Analysis

Tolerance = 30.0 mDa / DBE: min = -1.5, max = 100.0

Element prediction: Off

Number of isotope peaks used for i-FIT = 2

Monoisotopic Mass, Even Electron Ions

100 formula(e) evaluated with 6 results within limits (up to 1 best isotopic matches for each mass)

Elements Used:

C: 0-21 H: 0-40 N: 0-1 O: 0-5 S: 0-1 Br: 0-1

WP-ZHU

ECUST institute of Fine Chem

08-May-2014

19:27:15

1: TOF MS ES+

4.48e+003

ZWP-ZJ-620-045 78 (0.573) Cm (70:79)

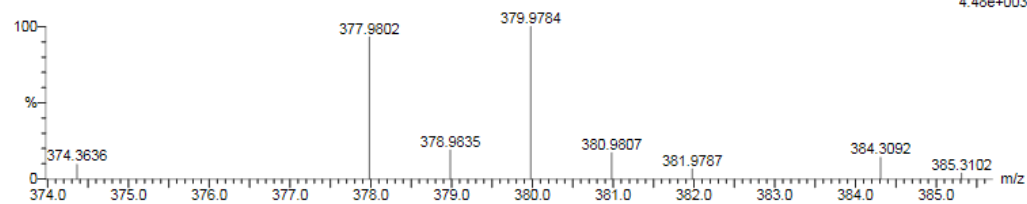

Minimum:

Maximum:

30.0

50.0

-1.5

100.0

Mass

Calc. Mass

mDa

PPM

DBE

i-FIT

i-FIT (Norm)

Formula

377.9802

377.9800

0.2

0.5

10.5

6.9

0.0

C16 H13 N O3 S Br
